# Supplementary material for: FUCCItrack: An all-in-one software for single cell tracking and cell cycle analysis
Source: PubMed Central journal article supplement (PMC9258891; doi:10.1371/journal.pone.0268297), 2022-07-06

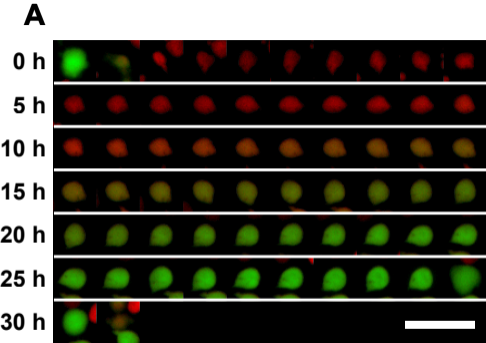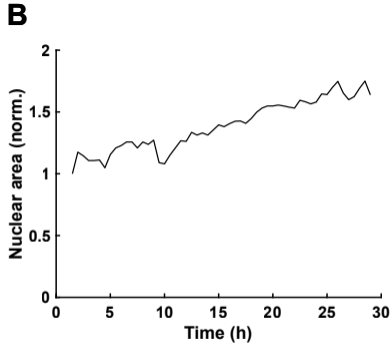

Supplement: pone.0268297.s005.pdf [file pone.0268297.s005.pdf]
